# Supplementary material
Source: Elsevier journal article supplement (https://www.sciencedirect.com/science/article/pii/S0213616320300458)
Supplement: mmc1 [file S0213616320300458:mmc1.docx]

**Are there effects of consultation-liaison-psychiatry on length of stay in the general hospital? A path analysis**

**Brunn M, Strain JJ, Diefenbacher A**

**Online Supplement**

Supplementary Table 1: Standardized total, direct and indirect effects of the path model

##### Standardized Total Effects

|  | yeardcr | age | karnofs | ama | urgency | ln_lagtime1 | discharge_loc | Drugreaction |
| --- | --- | --- | --- | --- | --- | --- | --- | --- |
| age | ,031 | ,000 | ,000 | ,000 | ,000 | ,000 | ,000 | ,000 |
| karnofsky | -,128 | -,102 | ,000 | ,000 | ,000 | ,000 | ,000 | ,000 |
| urgency | -,001 | ,033 | ,013 | ,134 | ,000 | ,000 | ,000 | ,000 |
| ln_lagtime1 | -,157 | ,140 | -,093 | ,064 | ,106 | ,000 | ,000 | ,000 |
| discharge_loc | ,008 | ,026 | -,057 | ,000 | ,000 | ,000 | ,000 | ,000 |
| Drugreaction | -,103 | -,070 | ,000 | ,000 | ,000 | ,000 | ,000 | ,000 |
| ln_los | -,193 | ,184 | -,169 | ,126 | ,071 | ,672 | ,083 | ,052 |

##### Standardized Direct Effects

|  | yeardcr | age | karnofs | ama | urgency | ln_lagtime1 | discharge_loc | Drugreaction |
| --- | --- | --- | --- | --- | --- | --- | --- | --- |
| age | ,031 | ,000 | ,000 | ,000 | ,000 | ,000 | ,000 | ,000 |
| karnofsky | -,125 | -,102 | ,000 | ,000 | ,000 | ,000 | ,000 | ,000 |
| urgency | ,000 | ,034 | ,013 | ,134 | ,000 | ,000 | ,000 | ,000 |
| ln_lagtime1 | -,173 | ,127 | -,094 | ,050 | ,106 | ,000 | ,000 | ,000 |
| discharge_loc | ,000 | ,020 | -,057 | ,000 | ,000 | ,000 | ,000 | ,000 |
| Drugreaction | -,101 | -,070 | ,000 | ,000 | ,000 | ,000 | ,000 | ,000 |
| ln_los | -,099 | ,081 | -,102 | ,083 | ,000 | ,672 | ,083 | ,052 |

##### Standardized Indirect Effects

|  | yeardcr | age | karnofs | ama | urgency | ln_lagtime1 | discharge_loc | Drugreaction |
| --- | --- | --- | --- | --- | --- | --- | --- | --- |
| age | ,000 | ,000 | ,000 | ,000 | ,000 | ,000 | ,000 | ,000 |
| karnofsky | -,003 | ,000 | ,000 | ,000 | ,000 | ,000 | ,000 | ,000 |
| urgency | -,001 | -,001 | ,000 | ,000 | ,000 | ,000 | ,000 | ,000 |
| ln_lagtime1 | ,016 | ,013 | ,001 | ,014 | ,000 | ,000 | ,000 | ,000 |
| discharge_loc | ,008 | ,006 | ,000 | ,000 | ,000 | ,000 | ,000 | ,000 |
| Drugreaction | -,002 | ,000 | ,000 | ,000 | ,000 | ,000 | ,000 | ,000 |
| ln_los | -,094 | ,103 | -,067 | ,043 | ,071 | ,000 | ,000 | ,000 |
